# Supplementary material for: Changes in expression of monocarboxylate transporters, heat shock proteins and meat quality of Large White Yorkshire and Ghungroo pigs during hot summer period
Source: PubMed Central journal article supplement — Asian-Australas J Anim Sci. 2016 May 22;30(2):246–53. doi: 10.5713/ajas.16.0020 (PMC5205613; doi:10.5713/ajas.16.0020), 2016-05-22
Supplement: ajas-30-2-246-supplementary.pdf [file ajas-30-2-246-supplementary.pdf]

1

## Supplement copy

### 2 Details of the climatic environment during experiments.

3 The climatic data was obtained from Meterological unit or observatory at Department of  
 4 Agricultural Meteorology & Physics, Bidhan Chandra Krishi Vishwavidhyalaya, Mohanpur, Nadia  
 5 District, West Bengal. The climatic parameters at observatory were recorded twice daily as per, India  
 6 Meteriological Department (IMD), Pune (India) at 6.35 am and 1.35 pm for a period of two months  
 7 (May 2014-June 2014). The average mean temperature (°C) during experimental days was 37.99°C;  
 8 RH (%) was 71.7%; rainfall (mm) was 2.26; wind speed (Km/hr) was 2.63. During the experimental  
 9 days, the average Temperature Humidity Index (THI) during May to June 2014 was 95.4 reflecting  
 10 that the animals were in heat stress condition.

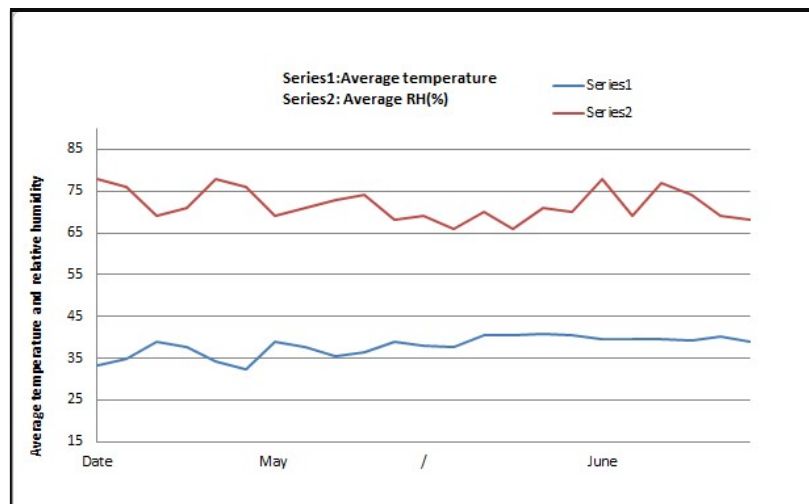

11

12 Average monthly temp (°C) and RH (%) at Mohanpur, Nadia district, West Bengal (Latitude: 22°56' N and Longitude: 88°32' E,  
 13 Altitude: 9.75 meters above mean sea level) for the year 2014.

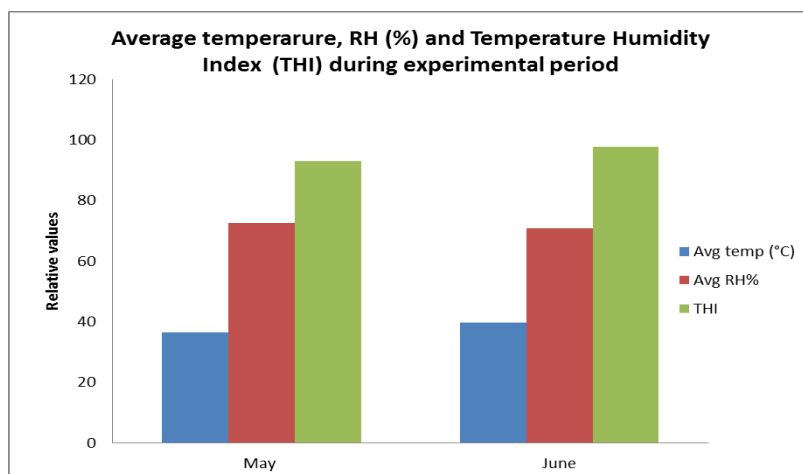

14

15 Average environmental conditions such as average temperature, RH% and THI during two months experiment(May and June 2014) at  
16 Mohanpur, West Bengal (Latitude: 22°56' N and Longitude: 88°32' E, Altitude: 9.75 meters above mean sea level).

17 All the pigs (5-6 months) were reared under Intensive farming system and were **exposed to hot**  
18 **summer from 10.30am to 2.30 pm (4 hours)**. In each pen 4 LWY as well as 4 Ghungroo were kept  
19 during experimental period. A covered concrete yard for feeding and resting having feed and water  
20 trough arranged in the front side and an open yard in the rear was provided for finisher pigs. After  
21 experimental period, pigs were transported to the slaughterhouse which is located 500 meter away  
22 from the farm. All the pigs were given rest of about 3-4 hrs before slaughter. All animals were allowed  
23 to drink water *ad libitum*.
